# Supplementary material
Source: publisher figshare collection journal article supplement (https://karger.figshare.com/ndownloader/files/13875467)
Supplement: Supplementary file 1 [file 13875467]

Supplementary Table A. Activity limitations and participation restrictions of the EPIDEMCA study sample, Central Africa, 2011-2012 (n=301).

|  |  | **Site** | | | |
| --- | --- | --- | --- | --- | --- |
|  | **ALL**  **(N=301)** | **NOLA  (rural CAR)**  **n=93 (30.9%)** | **BANGUI  (urban CAR)**  **n=62 (20.6%)** | **GAMBOMA  (rural ROC)**  **n=99 (32.9%)** | **BRAZZAVILLE  (urban ROC)**  **n=47 (15.6%)** |
| Item (CODE) | N (%) | n (%) | n (%) | n (%) | n (%) |
| Work in the fields (FIELDS) |  |  |  |  |  |
| Regularly and properly | 72 (23.9) | 31 (33.3) | 5 (8.1) | 31 (31.3) | 5 (10.6) |
| Regularly but not properly | 7 (2.3) | 4 (4.3) | 1 (1.6) | 2 (2.0) | 0 (0.0) |
| To advise younger generation | 4 (1.3) | 1 (1.1) | 0 (0.0) | 3 (3.0) | 0 (0.0) |
| To go for a walk | 3 (1.0) | 3 (3.2) | 0 (0.0) | 0 (0.0) | 0 (0.0) |
| No longer goes to the field | 165 (54.8) | 40 (43) | 43 (69.4) | 54 (54.5) | 28 (59.6) |
| Has never gone to the field | 50 (16.6) | 14 (15.1) | 13 (21.0) | 9 (9.1) | 14 (29.8) |
| Other professional activity (OCCUP) |  |  |  |  |  |
| Professional activity with sale, done properly | 60 (19.9) | 14 (15.1) | 8 (12.9) | 26 (26.3) | 12 (25.5) |
| Productive activity without sale | 18 (6.0) | 9 (9.7) | 3 (4.8) | 6 (6.1) | 0 (0.0) |
| No more activity | 223 (74.1) | 70 (75.3) | 51 (82.3) | 67 (67.7) | 35 (74.5) |
| Market attendance mode (MARKET) |  |  |  |  |  |
| Sells the product of his/her work | 58 (19.3) | 11 (11.8) | 6 (9.7) | 31 (31.3) | 10 (21.3) |
| To make some purchases | 51 (16.9) | 15 (16.1) | 12 (19.4) | 15 (15.2) | 9 (19.1) |
| To go for a walk | 5 (1.7) | 3 (3.2) | 0 (0.0) | 2 (2.0) | 0 (0.0) |
| No longer goes to the market | 187 (62.1) | 64 (68.8) | 44 (71.0) | 51 (51.5) | 28 (59.6) |
| Family and village festivals (FESTI) |  |  |  |  |  |
| Participates on his/her own initiative | 128 (42.5) | 30 (32.3) | 24 (38.7) | 57 (57.6) | 17 (36.2) |
| No longer participates but provides guidance | 10 (3.3) | 3 (3.2) | 3 (4.8) | 2 (2.0) | 2 (4.3) |
| Assists on the initiative of others | 33 (11.0) | 13 (14.0) | 15 (24.2) | 2 (2.0) | 3 (6.4) |
| No longer participates | 130 (43.2) | 47 (50.5) | 20 (32.3) | 38 (38.4) | 25 (53.2) |
| Religious ceremonies (CEREMONI) |  |  |  |  |  |
| Participates on his/her own initiative | 115 (38.2) | 24 (25.8) | 24 (38.7) | 50 (50.5) | 17 (36.2) |
| Attends on his/her own initiative | 45 (15.0) | 21 (22.6) | 10 (16.1) | 9 (9.1) | 5 (10.6) |
| Assists on the initiative of others | 23 (7.6) | 10 (10.8) | 8 (12.9) | 4 (4.0) | 1 (2.1) |
| No longer participates | 118 (39.2) | 38 (40.9) | 20 (32.3) | 36 (36.4) | 24 (51.1) |
| Education of children (EDUC) |  |  |  |  |  |
| Active involvement | 205 (68.1) | 78 (83.9) | 49 (79.0) | 50 (50.5) | 28 (59.6) |
| No longer participates | 96 (31.9) | 15 (16.1) | 13 (21.0) | 49 (49.5) | 19 (40.4) |
| Interest in public life (PUBLIC) |  |  |  |  |  |
| Voted and knows for who | 90 (29.9) | 29 (31.2) | 30 (48.4) | 22 (22.2) | 9 (19.1) |
| Voted but doesn't know for who | 30 (10.0) | 13 (14.0) | 8 (12.9) | 6 (6.1) | 3 (6.4) |
| Did not vote | 181 (60.1) | 51 (54.8) | 24 (38.7) | 71 (71.7) | 35 (74.5) |
| Games and leisure activities (domino, etc.) (LEISURE) |  |  |  |  |  |
| Plays board games correctly | 10 (3.3) | 3 (3.2) | 0 (0.0) | 4 (4.0) | 3 (6.4) |
| Plays board gales but not correctly | 1 (0.3) | 1 (1.1) | 0 (0.0) | 0 (0.0) | 0 (0.0) |
| Only watches others play | 8 (2.7) | 1 (1.1) | 5 (8.1) | 2 (2.0) | 0 (0.0) |
| No longer participates in board games | 282 (93.7) | 88 (94.6) | 57 (91.9) | 93 (93.9) | 44 (93.6) |
| Use of money (FINANCES) |  |  |  |  |  |
| No difficulty | 173 (57.5) | 45 (48.4) | 27 (43.5) | 66 (66.7) | 35 (74.5) |
| With some difficulties or needs help | 39 (13.0) | 19 (20.4) | 6 (9.7) | 8 (8.1) | 6 (12.8) |
| Does not manage his/her budget, but can make small purchases | 30 (10.0) | 15 (16.1) | 10 (16.1) | 2 (2.0) | 3 (6.4) |
| No longer using money | 59 (19.6) | 14 (15.1) | 19 (30.6) | 23 (23.2) | 3 (6.4) |
| Mobility (MOBILITY) |  |  |  |  |  |
| Moves without problems, uses the means of transport | 87 (28.9) | 26 (28.0) | 15 (24.2) | 24 (24.2) | 22 (46.8) |
| Moves only on foot | 83 (27.6) | 27 (29.0) | 16 (25.8) | 36 (36.4) | 4 (8.5) |
| No longer moves farther from home | 131 (43.5) | 40 (43.0) | 31 (50.0) | 39 (39.4) | 21 (44.7) |
| Housekeeping (HOME) |  |  |  |  |  |
| Actively involved in home maintenance | 132 (43.9) | 35 (37.6) | 20 (32.3) | 54 (54.5) | 23 (48.9) |
| Cleaning only in his/her room | 51 (16.9) | 17 (18.3) | 13 (21.0) | 15 (15.2) | 6 (12.8) |
| No longer participates in home maintenance | 118 (39.2) | 41 (44.1) | 29 (46.8) | 30 (30.3) | 18 (38.3) |
| Meal preparation (MEAL) |  |  |  |  |  |
| Prepares meals for her/himself and other people | 109 (36.2) | 31 (33.3) | 21 (33.9) | 40 (40.4) | 17 (36.2) |
| Prepares meals only for her/himself | 61 (20.3) | 20 (21.5) | 9 (14.5) | 24 (24.2) | 8 (17) |
| Actively involved in meals preparation | 2 (0.7) | 0 (0.0) | 2 (3.2) | 0 (0.0) | 0 (0.0) |
| No longer participates in meal preparation | 129 (42.9) | 42 (45.2) | 30 (48.4) | 35 (35.4) | 22 (46.8) |
| Message transmission (MESSAGE) |  |  |  |  |  |
| Transmits the message on his/her own initiative correctly | 191 (63.5) | 49 (52.7) | 33 (53.2) | 78 (78.8) | 31 (66) |
| Transmits the message correctly only on request | 23 (7.6) | 8 (8.6) | 7 (11.3) | 4 (4.0) | 4 (8.5) |
| Transmits the message partially | 57 (18.9) | 27 (29) | 15 (24.2) | 6 (6.1) | 9 (19.1) |
| Forgets to say that someone has passed and forgets the message | 30 (10.0) | 9 (9.7) | 7 (11.3) | 11 (11.1) | 3 (6.4) |
| Laundry (LAUNDRY) |  |  |  |  |  |
| Wash her/his linen on her/his own properly, on her/his initiative | 157 (52.2) | 37 (39.8) | 25 (40.3) | 62 (62.6) | 33 (70.2) |
| Wash her/his linen on her/his own properly, without initiative | 22 (7.3) | 7 (7.5) | 8 (12.9) | 6 (6.1) | 1 (2.1) |
| Needs help to do the laundry | 122 (40.5) | 49 (52.7) | 29 (46.8) | 31 (31.3) | 13 (27.7) |
| Bathing (BATHING) |  |  |  |  |  |
| Grooms her/himself on her/his own initiative | 233 (77.4) | 61 (65.6) | 46 (74.2) | 83 (83.8) | 43 (91.5) |
| Grooms her/himself but needs to be stimulated | 12 (4.0) | 4 (4.3) | 2 (3.2) | 5 (5.1) | 1 (2.1) |
| Grooms her/himself but not properly | 25 (8.3) | 16 (17.2) | 7 (11.3) | 1 (1.0) | 1 (2.1) |
| Needs help to bathe (movement, visual disorders, etc.) | 14 (4.7) | 4 (4.3) | 2 (3.2) | 6 (6.1) | 2 (4.3) |
| Needs help to bathe (severe movement, visual disorders, etc.) | 17 (5.6) | 8 (8.6) | 5 (8.1) | 4 (4.0) | 0 (0.0) |
| Dressing (DRESSING) |  |  |  |  |  |
| Dresses on his/her own and properly | 222 (73.8) | 60 (64.5) | 45 (72.6) | 76 (76.8) | 41 (87.2) |
| Dresses on his/her own but not properly | 47 (15.6) | 21 (22.6) | 9 (14.5) | 13 (13.1) | 4 (8.5) |
| Needs help to dress (movement, visual disorders, etc.) | 13 (4.3) | 3 (3.2) | 2 (3.2) | 6 (6.1) | 2 (4.3) |
| Needs help to dress (severe movement, visual disorders, etc.) | 19 (6.3) | 9 (9.7) | 6 (9.7) | 4 (4.0) | 0 (0.0) |

*Notes*. CAR: Central Africa Republic; ROC: Republic of Congo.
